# Supplementary figures and images for: Evaluating the physiological state of maize ( Zea mays L.) plants by direct-injection electrospray mass spectrometry (DIESI-MS)
Source: Royal Society of Chemistry journal article supplement (doi:10.1039/c2mb25056j), 2012-04-03

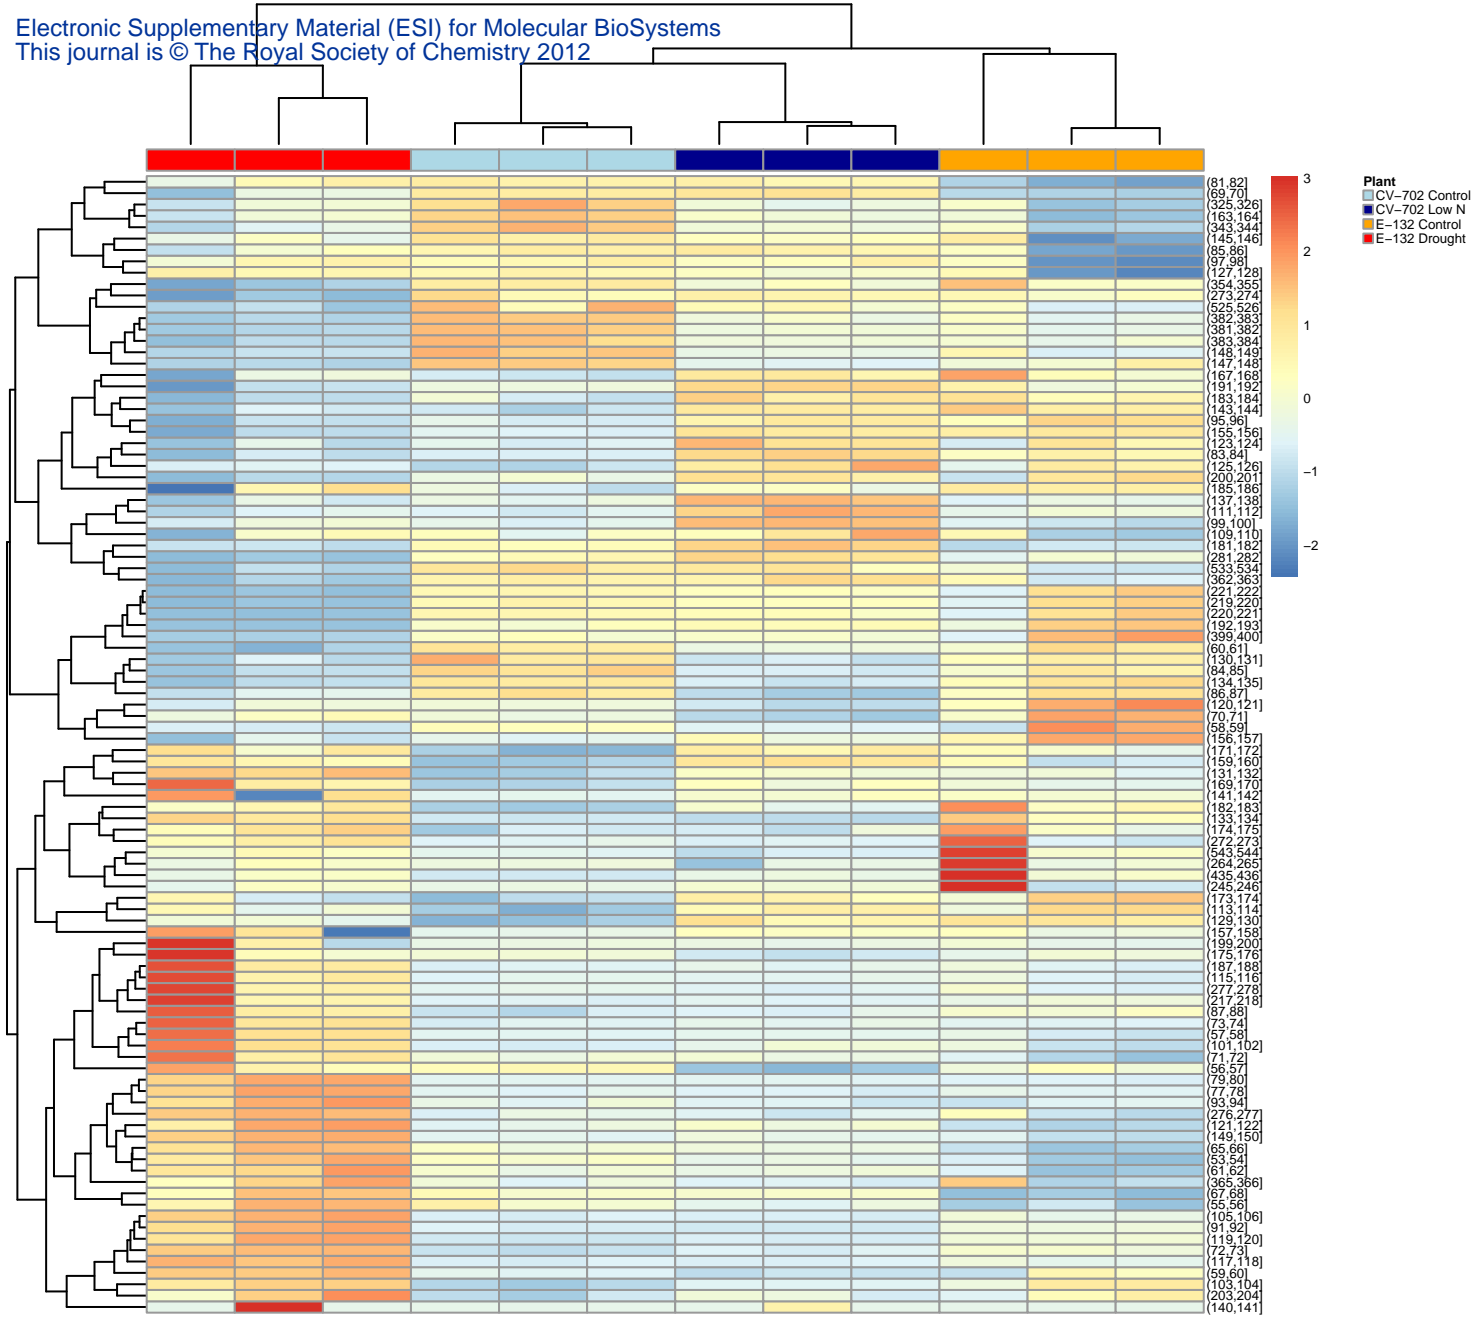

Supplement: c2mb25056j_2.pdf [file c2mb25056j_2.pdf]
